# Supplementary material for: Ensemble Approach Using k-Partitioned Isolation Forests for the Detection of Stock Market Manipulation
Source: MDPI journal article supplement (doi:10.3390/math12091336), 2024-04-27
Supplement: s1 [file s1]

The average results of the different experiments performed. The numbers in the experiment name represent the subsets and the threshold used. For example, k2\_t1 indicates that the dataset is divided into two subsets, and the threshold is set to 1.

| Experiment | recall | precision | F1    | F2    |
|------------|--------|-----------|-------|-------|
| k2_t1      | 0.80   | 0.045     | 0.084 | 0.182 |
| k2_t2      | 0.54   | 0.093     | 0.160 | 0.277 |
| k3_t1      | 0.86   | 0.031     | 0.059 | 0.134 |
| k3_t2      | 0.65   | 0.062     | 0.113 | 0.224 |
| k3_t3      | 0.46   | 0.123     | 0.193 | 0.298 |
