# Supplementary material for: Ensemble Approach Using k-Partitioned Isolation Forests for the Detection of Stock Market Manipulation
Source: MDPI journal article supplement (doi:10.3390/math12091336), 2024-04-27

Box plots showcasing the performance of the Isolation Forest algorithm across different data variants, evaluated using diverse metrics.

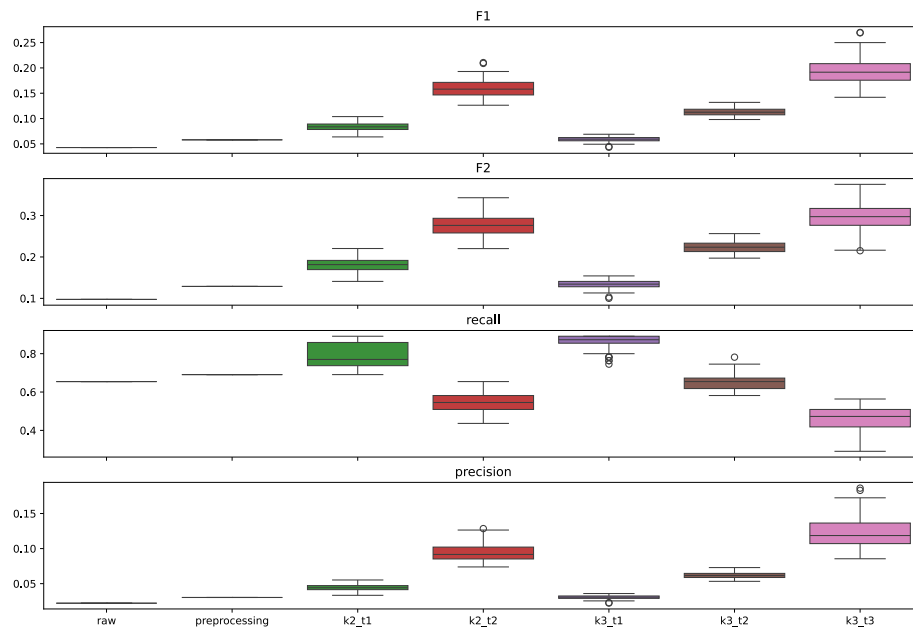

Supplement: s1 [file s1]
